# Supplementary material for: Ultra-Low Percolation Threshold Induced by Thermal Treatments in Co-Continuous Blend-Based PP/PS/MWCNTs Nanocomposites
Source: MDPI journal article supplement (doi:10.3390/nano11061620), 2021-06-21
Supplement: s1 [file s1]

# Ultra-Low Percolation Threshold Induced by Thermal Treatments in Co-Continuous Blend-Based PP/PS/MWCNTs Nanocomposites

Daria Strugova, José Carlos Ferreira Junior, Éric David and Nicole R. Demarquette \*

Mechanical Engineering Department, École de Technologie Supérieure, Montréal, Québec H3C 1K3, Canada;  
daria.strugova.1@ens.etsmtl.ca (D.S.); jose-carlos.ferreira-junior.1@ens.etsmtl.ca (J.C.F.J.);  
Eric.David@etsmtl.ca (É.D.)

\* Correspondence: NicoleR.Demarquette@etsmtl.ca

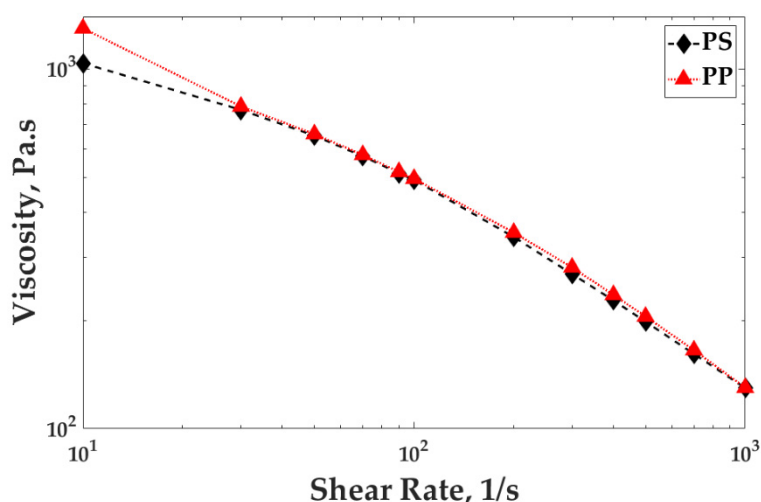

Figure S1. Viscosity as a function of shear rate measured by capillary rheometer for pure PP and PS.

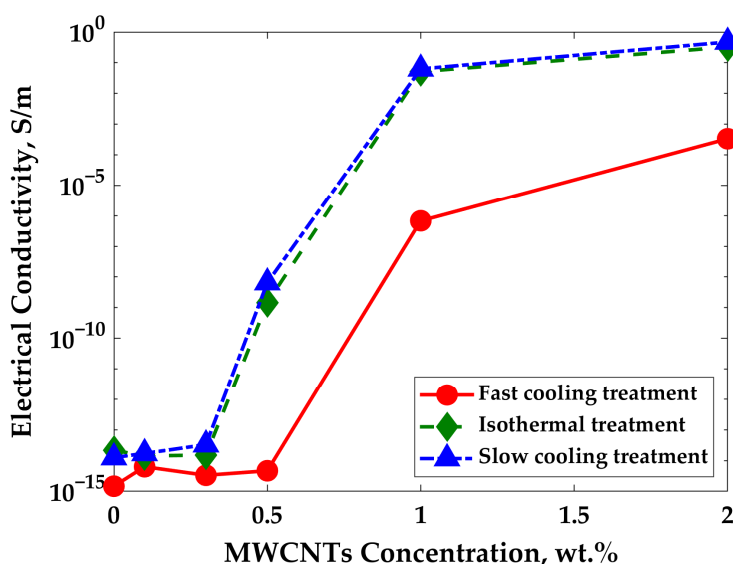

Figure S2. Effect of treatments on electrical conductivity as a function of MWCNTs concentration for PP/MWCNTs composites.

**Table S1.** Percolation threshold and fitting values of experimental data according to the equation 1 for PP/MWCNTs composites after each treatment.

| Parameters    | Fast cooling treatment | Isothermal treatment | Slow cooling treatment |
|---------------|------------------------|----------------------|------------------------|
| $p_c$ , wt. % | 0.6                    | 0.44                 | 0.38                   |
| $k$ , S/m     | $6.5 \times 10^{-5}$   | 0.15                 | 0.17                   |
| $t$           | 4.9                    | 1.8                  | 2.1                    |
| $R^2$         | 1                      | 0.95                 | 0.93                   |

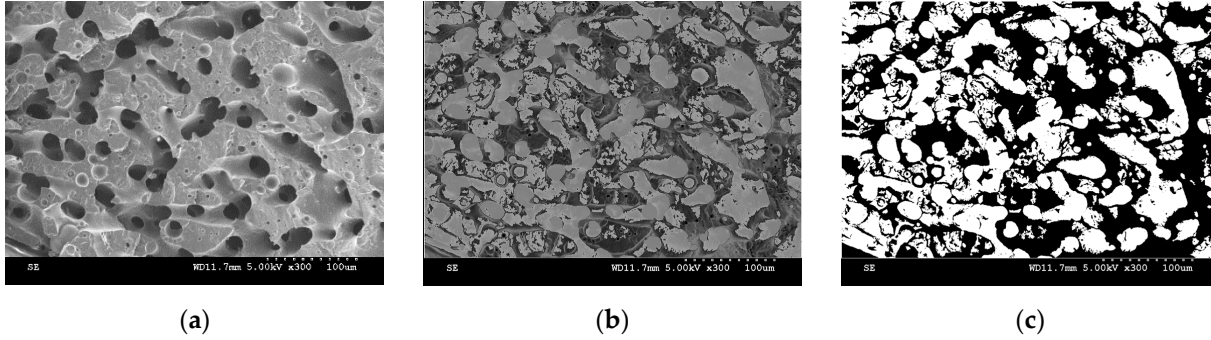

**Figure S3.** Image treatment analysis for distinguishing between two phases: (a) original SEM picture for PP/PS/MWCNTs composite with 0.3 wt.% of MWCNTs; (b) image phase separation; (c) final treated image which was used for the estimation of  $L_{int}$  - interface length between two phases, which in this case is the perimeter of white phase.

**Table S2.** Melting and crystallization temperatures, onset and end of crystallization and degree of crystallinity for PP/MWCNTs and PP/PS/MWCNTs nanocomposites.

| Material   | CNTs amount, wt. % | Peak of $T_m$ , °C | Peak of $T_c$ , °C | Onset $T_c$ , °C | End $T_c$ , °C | $X_c$ , %     |
|------------|--------------------|--------------------|--------------------|------------------|----------------|---------------|
| PP/CNTs    | 0                  | $166 \pm 0.2$      | $112 \pm 0.1$      | $117 \pm 0.2$    | $107 \pm 1.2$  | $47 \pm 0.09$ |
|            | 0.1                | $165 \pm 0.2$      | $121 \pm 0.1$      | $126 \pm 0.2$    | $118 \pm 0.1$  | $48 \pm 0.08$ |
|            | 0.3                | $166 \pm 0.3$      | $124 \pm 0.2$      | $128 \pm 0.1$    | $120 \pm 0.2$  | $47 \pm 0.1$  |
|            | 0.5                | $167 \pm 0.9$      | $126 \pm 0.2$      | $130 \pm 0.1$    | $121 \pm 1.2$  | $49 \pm 1.8$  |
| PP/PS/CNTs | 0                  | $166 \pm 0.5$      | $117 \pm 0.1$      | $122 \pm 0.1$    | $113 \pm 0.1$  | $52 \pm 1.4$  |
|            | 0.1                | $165 \pm 1.3$      | $119 \pm 0.2$      | $123 \pm 0.1$    | $114 \pm 0.4$  | $51 \pm 0.2$  |
|            | 0.3                | $167 \pm 0.3$      | $121 \pm 0.2$      | $126 \pm 0.5$    | $116 \pm 0.1$  | $48 \pm 0.8$  |
|            | 0.5                | $168 \pm 0.2$      | $122 \pm 0.2$      | $127 \pm 0.4$    | $117 \pm 0.1$  | $52 \pm 0.6$  |

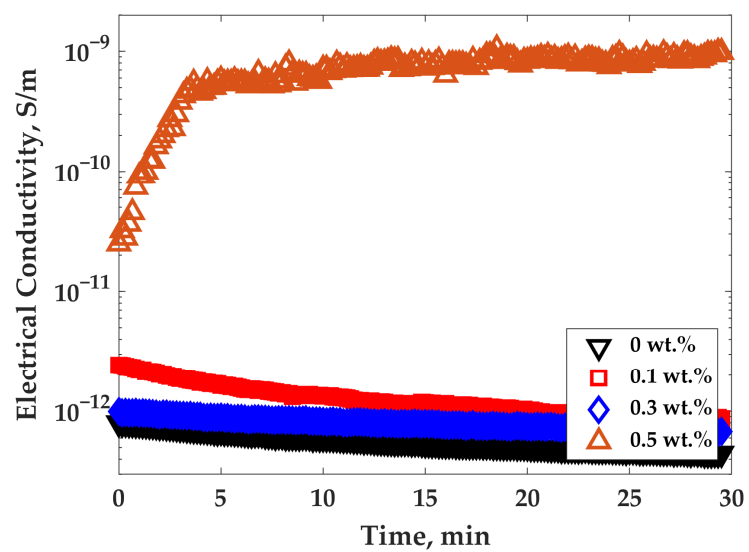

**Figure S4.** Electrical conductivity as a function of time for PP/MWCNTs composite with 0-0.3 wt.% of MWCNTs measured every 10 s at 1 Hz of frequency and 135 °C.

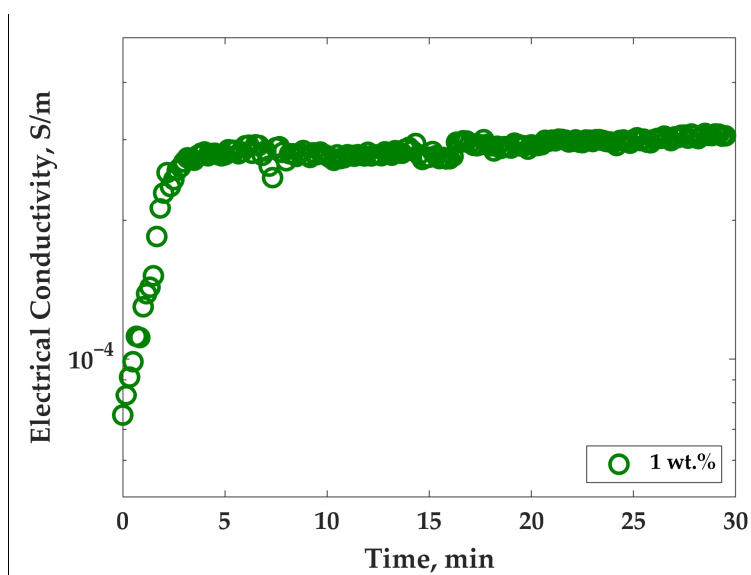

**Figure S5.** Electrical conductivity as a function of time for PP/MWCNTs composite with 1 wt.% of MWCNTs measured every 10 s at 1 Hz of frequency and 135 °C.
